# Supplementary material
Source: Elsevier journal article supplement (https://www.sciencedirect.com/science/article/pii/S1699258X17301390)
Supplement: mmc1 [file S1699258X17301390:mmc1.docx]

**Anexo 1.**

**Formato para evaluar las HC, aplicado por el paciente (imagen superior) y por el evaluador (imagen inferior).**

**
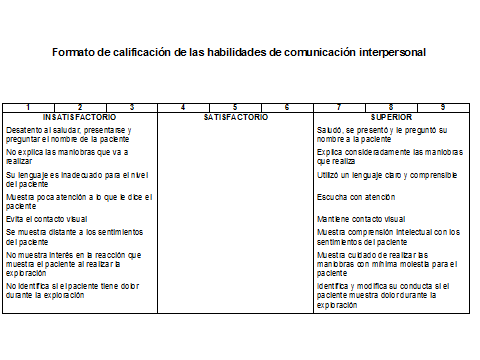

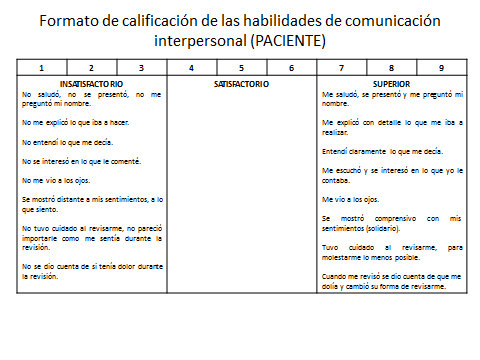
**
